# Supplementary material
Source: PubMed Central journal article supplement (PMC5485664)
Supplement: NIHMS869296-supplement-Supplemental_2.pdf [file NIHMS869296-supplement-Supplemental_2.pdf]

## **SUPPLEMENTARY MATERIAL 2**

### **Chimeric transcripts resulting from complex duplications in chromosome Xq28**

#### *Human Genetics*

Luciana W. Zuccherato<sup>1</sup>, Benjamin Alleva<sup>2</sup>, Marjorie A. Whitters<sup>1</sup>, Claudia M. B. Carvalho<sup>1,3</sup>, James R. Lupski<sup>1,4,5\*</sup>

<sup>1</sup>Department of Molecular & Human Genetics, Baylor College of Medicine, Houston, TX, USA.

<sup>2</sup>Biology Department, University of Iowa, Iowa City, IA, USA.

<sup>3</sup>Centro de Pesquisas René Rachou - FIOCRUZ, Belo Horizonte, MG, Brazil.

<sup>4</sup>Pediatrics, Baylor College of Medicine, Houston, TX, USA.

<sup>5</sup>Texas Children's Hospital, Houston, TX, USA.

\*Corresponding author:

jlupski@bcm.edu

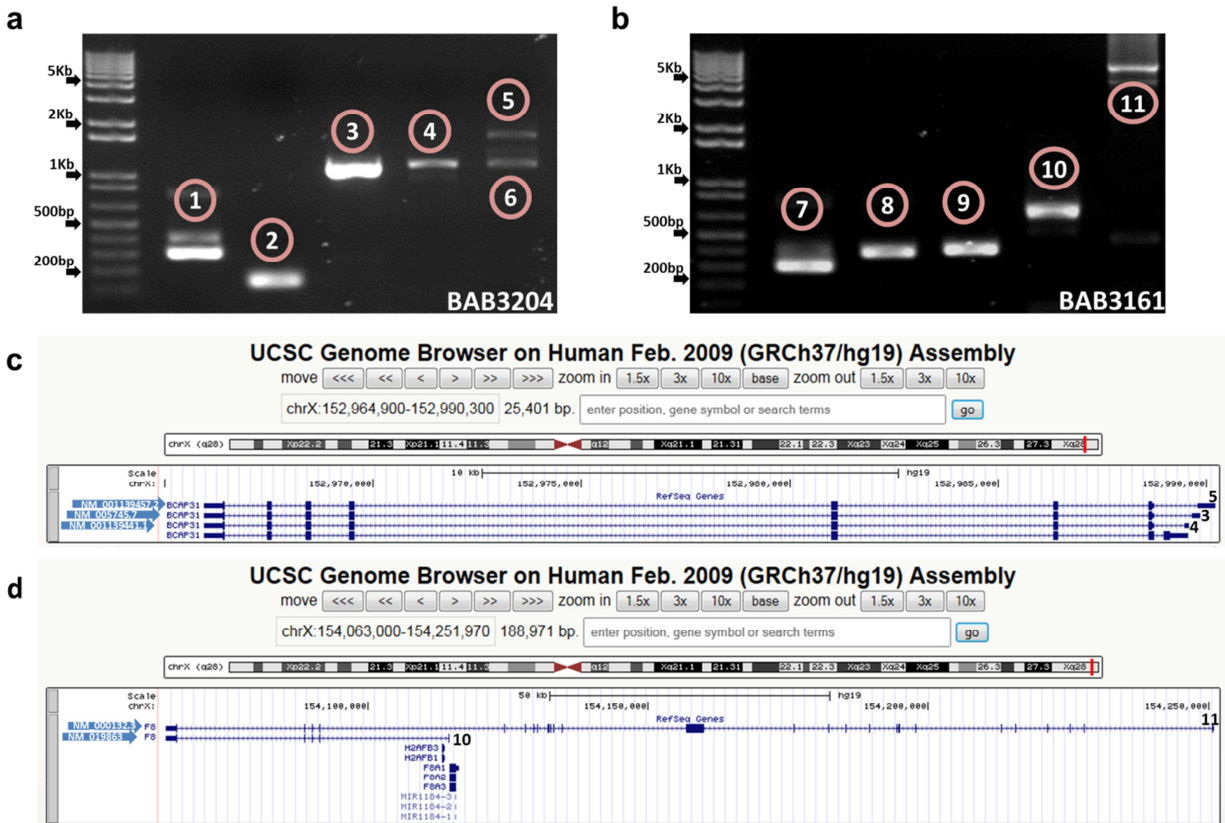

**Supplementary Fig. 1** Chimeric transcripts from patients with Xq28 duplication. Expression of the predicted chimeric genes in the LCLs derived from patients BAB3204 and BAB3161 were confirmed using RT-PCR. (a) RT-PCR results from patient BAB3204. The bands in the agarose gel represent: 1- Size: 305 bp represents RT-PCR positive control (*KDMC4*); 2- Size: 137 bp represents RT-PCR band obtained using primers that target exons flanking genomic breakpoint junction. Bands 3-5 correspond to RT-PCR of three *BCAP31* fusion transcripts: 3- NM\_005745.7, 1078 bp; 4- NM\_001139441.1, 1112 bp; 5- NM\_001139457.2, 1619 bp. 6- Size: 1463 bp represents an unexpected alternative splicing transcript for *BCAP31*. (b) RT-PCR results from patient BAB3161. The bands in the agarose gel represent: 7- Size: 305 bp represents RT-PCR positive control (*KDMC4*); 8- Size: 386 bp represents RT-PCR band obtained using primers that target exons flanking genomic breakpoint junction of *F8* transcript II (short, NM\_019863.2); 9- Size: 395 bp represents RT-PCR band obtained using primers that target exons flanking genomic breakpoint junction of transcript I (long, NM\_000132.3); 10- Size: 721 bp represents *F8* fusion transcript II; 11- Size: 7695 bp represents *F8* fusion transcript I. Splicing variant transcripts in the RefSeq database for *BCAP31* (c) and *F8* genes (d). Numbers shown on the right correspond to the RT-PCR bands obtained from BAB3204 (a) and BAB3161 (b)
